# Supplementary material for: Remodeling the conformational dynamics of I-motif DNA by helicases in ATP-independent mode at acidic environment
Source: PubMed Central journal article supplement — iScience. 2021 Dec 6;25(1):103575. doi: 10.1016/j.isci.2021.103575 (PMC8704484; doi:10.1016/j.isci.2021.103575), 2021-12-06
Supplement: mmc1.pdf [file mmc1.pdf]

**iScience, Volume 25**

**Supplemental information**

**Remodeling the conformational dynamics  
of I-motif DNA by helicases in ATP-independent  
mode at acidic environment**

**Bo Gao, Ya-Ting Zheng, Ai-Min Su, Bo Sun, Xu-Guang Xi, and Xi-Miao Hou**

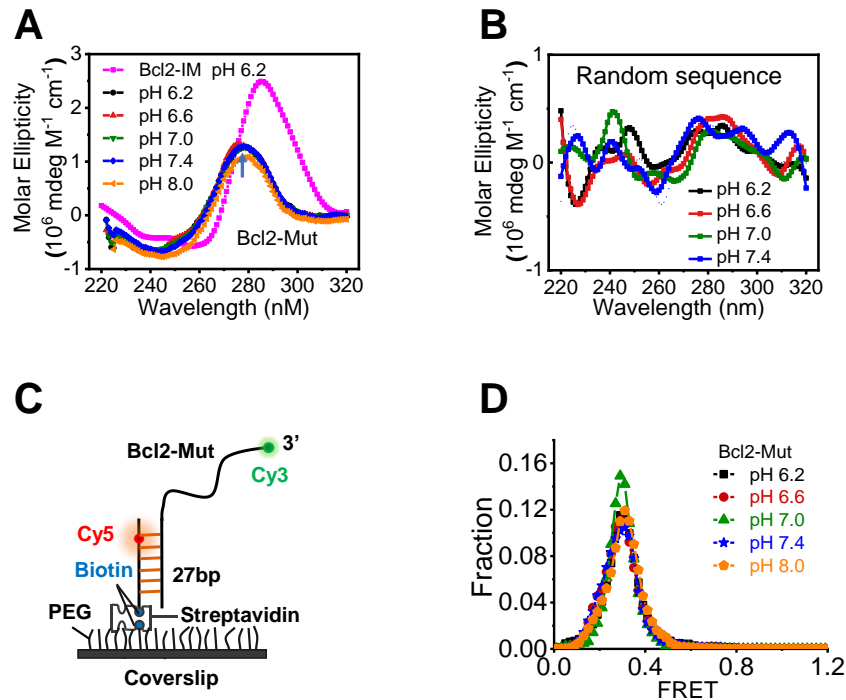

**Figure S1. The Bcl2-Mut and the random single-stranded DNA sequences both display little changes with the increases in pH values. Related to Figure 1. (A-B)** CD spectrum of Bcl2-Mut and the 20-nt random ssDNA at different pH. This random sequence does not have a distinctive peak or valley. However, Bcl2-Mut displays a characteristic peak at 275 nm indicated by the arrow, which is different from the typical peak of Bcl2-IM at 285 nm as well as the spectrum of random sequence, probably reflecting the formation of some unknown secondary structures as C<sup>+</sup>:C base pairs may be formed in this sequence. **(C)** The schematic design of smFRET experiment. The 3'-partial duplex DNA with Bcl2-Mut sequence was anchored onto the coverslip via the 27-bp stem. **(D)** FRET distributions of Bcl2-Mut at different pH.

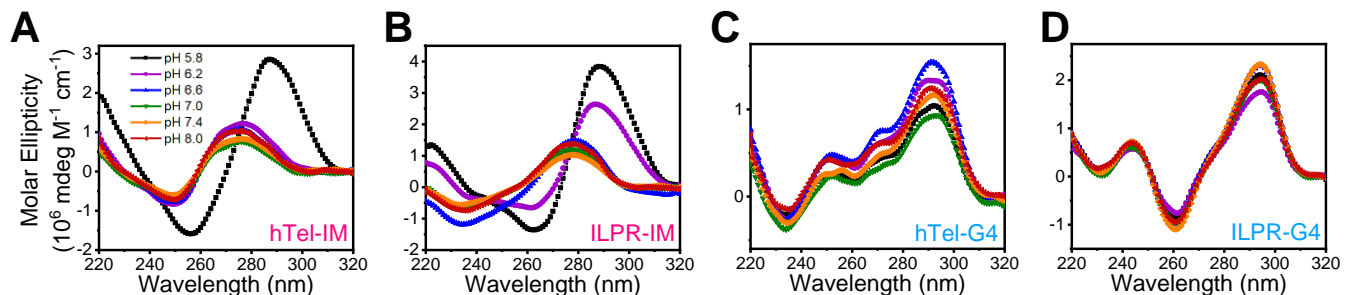

**Figure S2. CD spectrum of different i-motif and G4 DNA. Related to Figure 1. (A-B)** CD spectrum of i-motif DNA formed at different pH with the sequences from human telomere, and ILPR promoter. **(C-D)** CD spectrum of G4 DNA formed at different pH with the sequences from human telomere, and ILPR promoter.

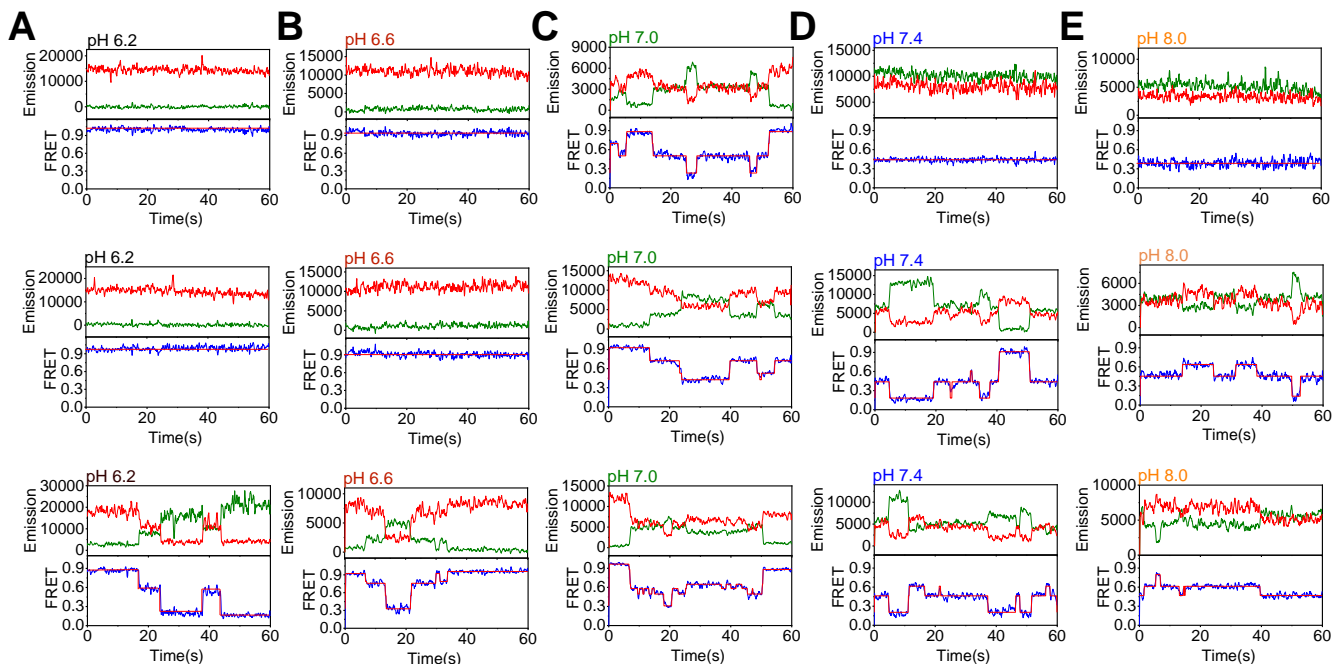

**Figure S3. The representative fluorescence and FRET traces of Bcl2-IM at different pH. Related to Figure 2. (A-B)** At pH 6.2 and pH 6.6, the majority of traces are static at  $\sim E_{0.95}$ . **(C)** At pH 7.0, the majority of traces are dynamic with slow transitions between different states. **(D-E)** At pH 7.4 and pH 8.0, the majority of traces are dynamic. For the static traces, FRET values are maintained at  $\sim E_{0.45}$ .

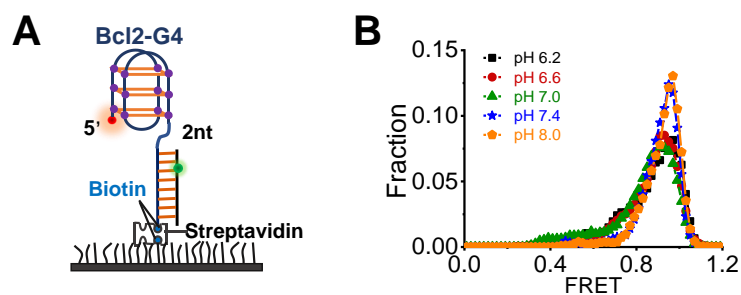

**Figure S4. G4s display little changes with the increases in pH. Related to Figure 2. (A)** The schematic design of smFRET experiment for Bcl2-G4. G4 DNA was placed at the 5'-end of the duplex. **(B)** FRET distributions of Bcl2-G4 at different pH.

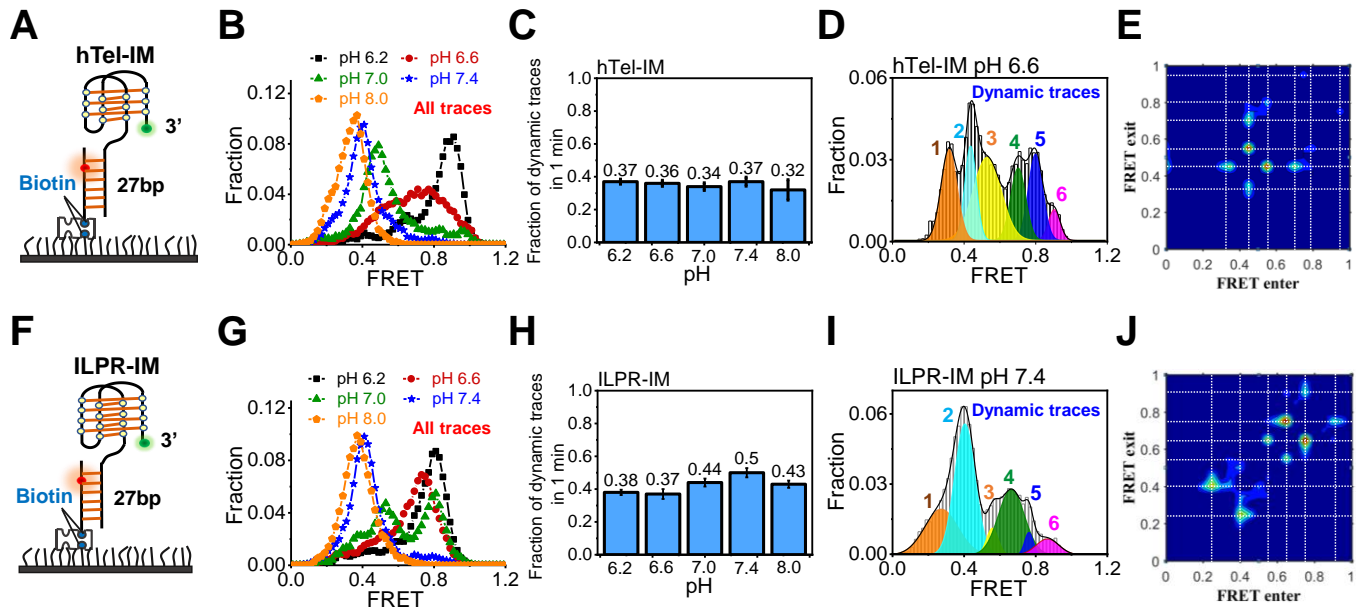

**Figure S5. The i-motifs from the human telomere and ILPR promoter display six folding states. Related to Figure 2.** (A) The schematic design of smFRET experiment for hTel-IM. (B) FRET distributions of hTel-IM at different pH. All traces were included whether it was static or dynamic. (C) The fractions of FRET traces showing dynamic changes during the 1-min recording time. Data are represented as mean  $\pm$  SEM. (D) FRET distribution of the dynamic hTel-IM traces at pH 6.6. (E) The transition density plot (TDP) of the dynamic hTel-IM traces at pH 6.6. The dashed lines indicate the six different FRET states. (F) The schematic design of smFRET experiment for ILPR-IM. (G) FRET distributions of ILPR-IM at different pH. All traces were included whether it was static or dynamic. (H) The fractions of FRET traces showing dynamic changes during the 1-min recording time. Data are represented as mean  $\pm$  SEM. (I) FRET distribution of the dynamic ILPR-IM traces at pH 7.4. (J) The transition density plot (TDP) of the dynamic ILPR-IM traces at pH 7.4. The dashed lines indicate the six different FRET states.

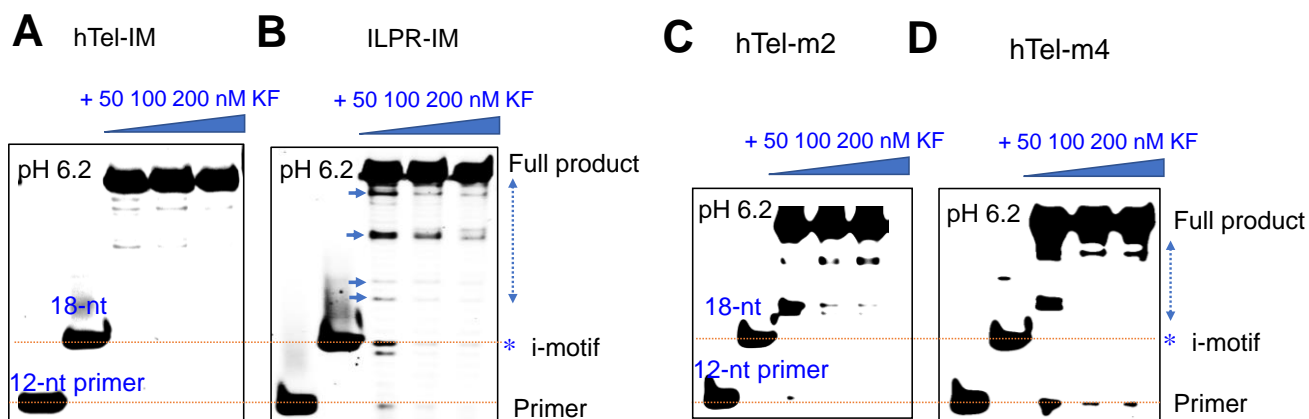

**Figure S6. KF stop assay with different i-motif templates at pH 6.2. Related to Figure 2.** DNA template was 1  $\mu$ M and 50-200 nM KF was used. The bottom line shows the position of the 12-nt primer. The other line indicates the 18-nt FAM labelled sequence which mimics the polymerization of 6-nt poly-T linker only (Table S1). (A-B) Analysis of the KF replication reactions with hTel-IM and ILPR-IM templates. The arrows indicate the intermediate bands in ILPR-IM. (C-D) Polymerization of two partial i-motif sequences at pH 6.2.

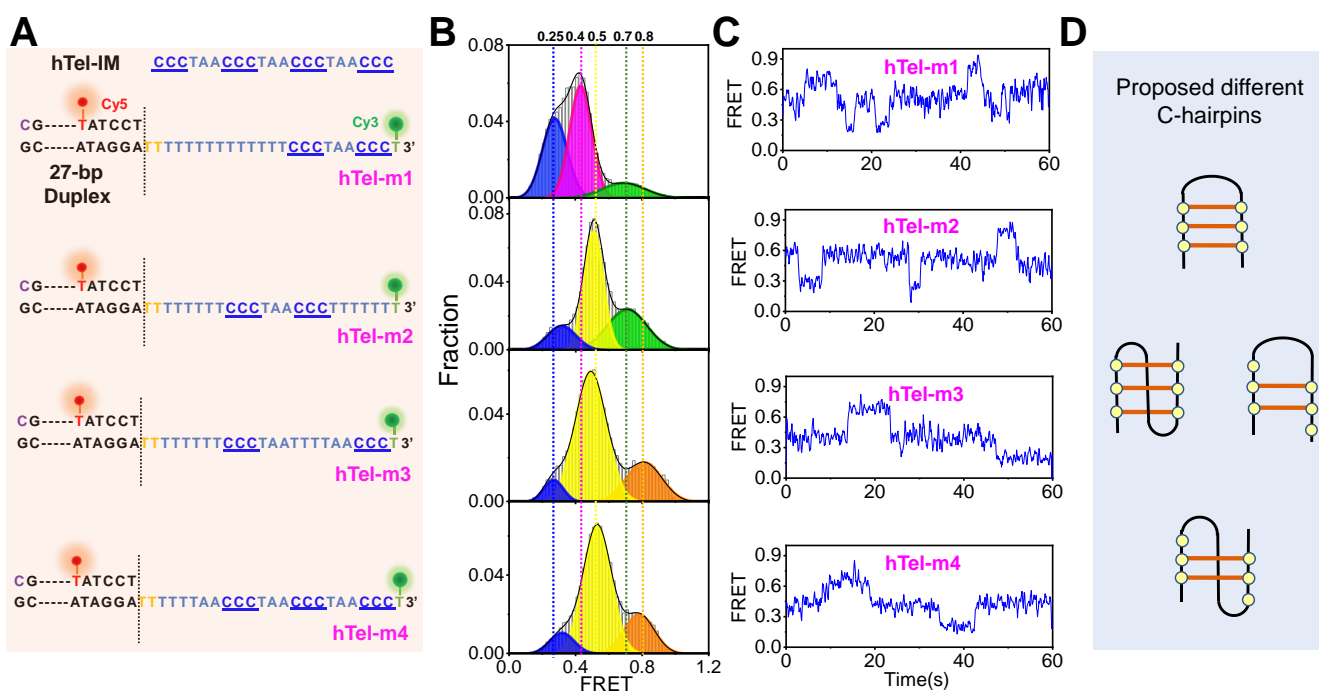

**Figure S7. Different forms of C-hairpin are the probable folding intermediates of i-motif DNA. Related to Figure 2.** (A) The schematic design of the ssDNA with partial i-motif sequences. Three or two C-tracts are included with different loop lengths. The acidic condition at pH 5.8 was used to promote the folding of higher-order structures. (B) FRET distributions of the structures formed by the partial i-motif sequences. (C) The representative FRET traces showing the dynamic changes of those structures. (D) The proposed C-hairpin structures formed by the partial i-motif sequences.

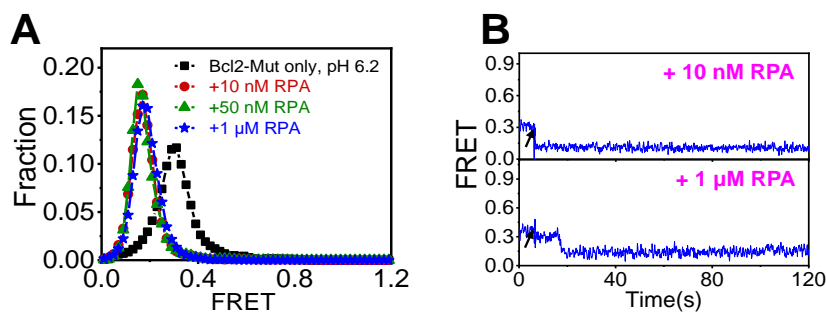

**Figure S8. The Bcl2-Mut sequence can be bound and stretched by RPA at pH 6.2. Related to Figure 3. (A)** FRET distributions of Bcl2-Mut at pH 6.2 before and 4 min after the addition of RPA. **(B)** The representative FRET traces with the addition of 10 nM to 1  $\mu$ M RPA. The black arrows indicate the addition of protein.

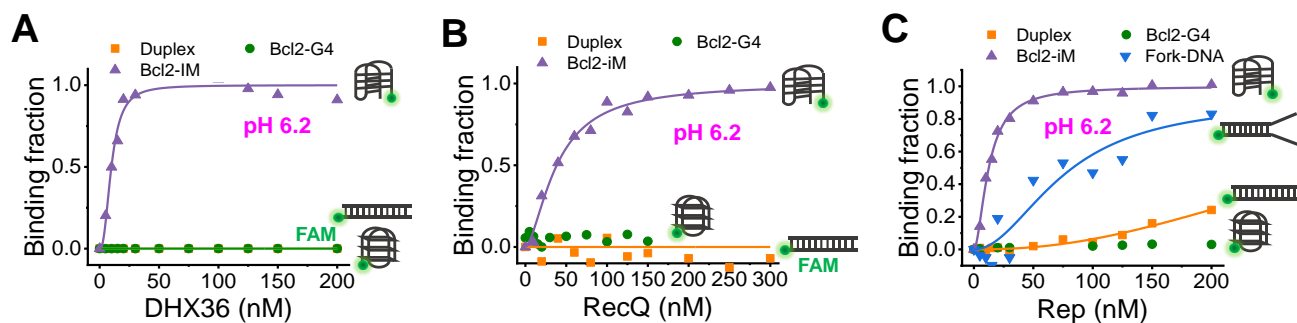

**Figure S9. The binding of DHX36, RecQ, and Rep helicases with different DNA substrates at pH 6.2. Related to Figure 4. (A-C)** Changes of DNA binding fractions with the increases in helicase concentrations. The binding curve was fitted by the Hill equation:  $y = [\text{protein}]^n / (K_d^n + [\text{protein}]^n)$ , where  $y$  is the binding fraction,  $n$  is the Hill coefficient, and  $K_d$  is the apparent dissociation constant.

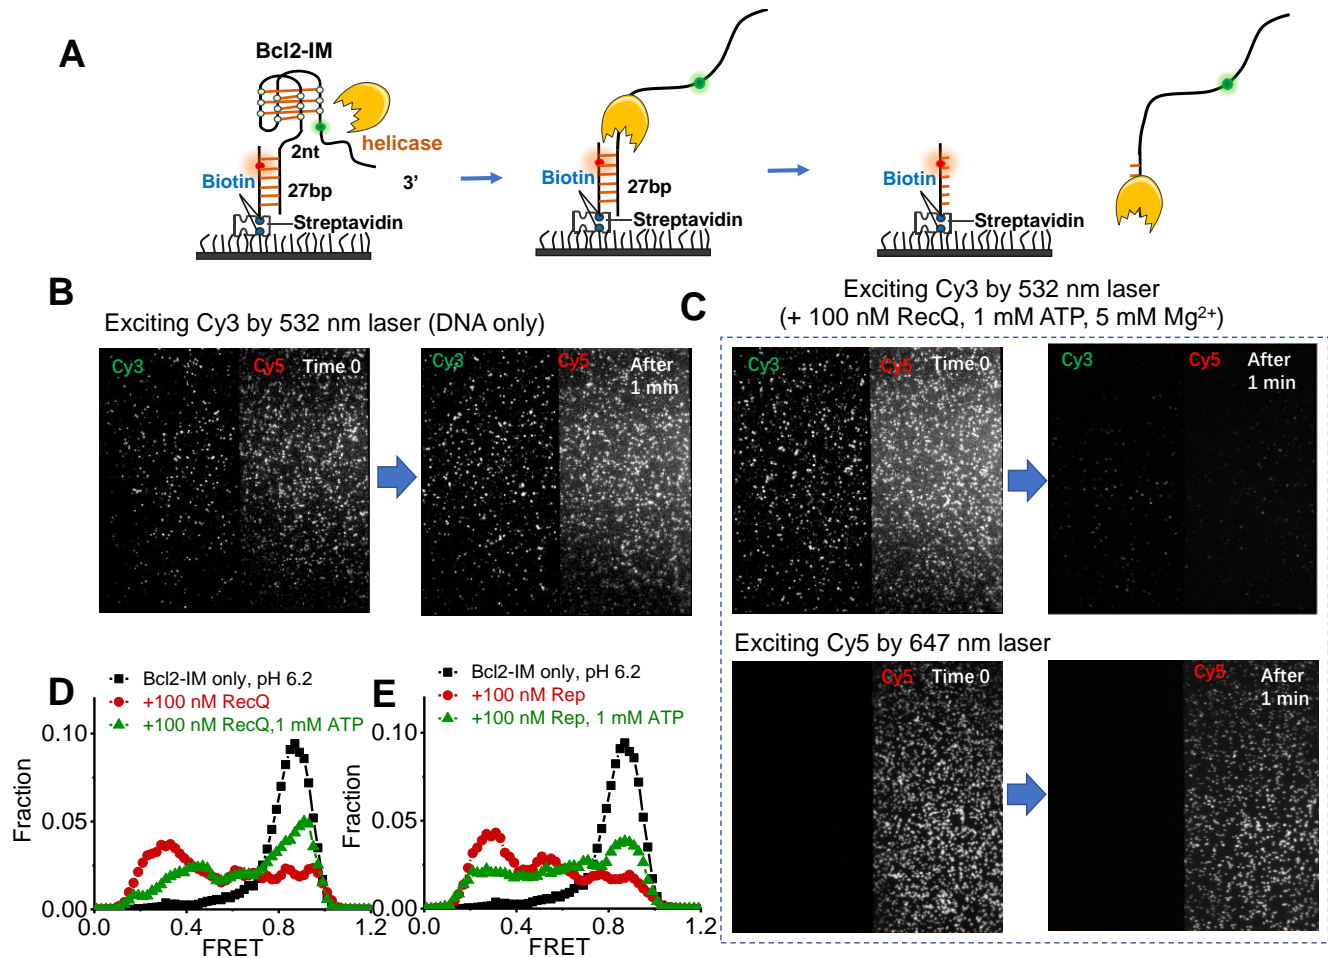

**Figure S10. The effects of ATP on the activity of RecQ and Rep helicases. Related to Figure 5.** (A) Once the downstream duplex was efficiently unwound by helicases at the ATP-hydrolysis state, the Cy3-strands would be released from the surface and the FRET distributions cannot be determined. Meanwhile, the Cy5-strands were still anchored at the surface. (B) Most of the fluorophores carried by the Bcl2-IM substrate did not undergo photobleaching within a time scale of 1 min excitation. (C) The upper panel shows that, upon the addition of helicases at the ATP hydrolysis state, taking RecQ for an example, both the Cy3 and Cy5 spots disappeared significantly with the excitation of Cy3 by the 532 nm laser. However, Cy5 fluorophores were still there when the 647 nm laser was turned on. The above two pieces of evidence together can reflect the unwinding of duplex DNA, as illustrated in Figure S10A. It is worth noting that the Cy5 spots we observed with the direct excitation by 647 nm laser were usually more than that with 532 nm laser, possibly because not every Cy5-strand has an annealed Cy3-strand or some Cy3 fluorophores in Cy3-strands were dead fluorophores. (D-E) FRET distributions of Bcl2-IM before and 4 min after the addition of RecQ and Rep at the apo, and ATP-binding states. The FRET distributions after the addition of RecQ and Rep at ATP hydrolysis state cannot be determined due to the significant disappearance of fluorescent spots.

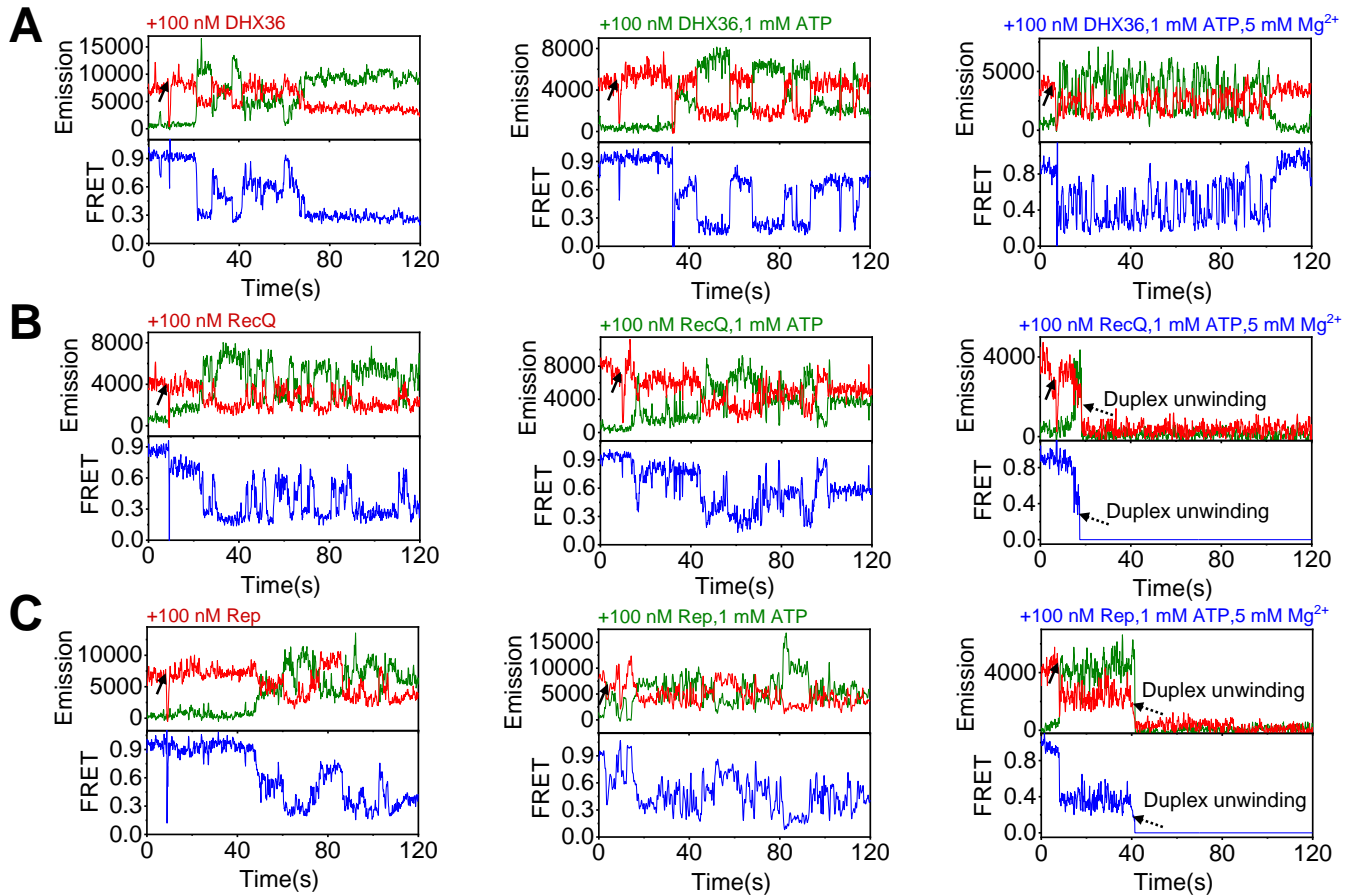

**Figure S11. The representative fluorescence emission and FRET traces of Bcl2-IM with the addition of helicases. Related to Figure 5.** (A) Traces of Bcl2-IM with the addition 100 nM DHX36 at the apo, ATP-binding, and ATP-hydrolysis states. (B) Traces of Bcl2-IM with the addition of 100 nM RecQ at the apo, ATP-binding, and ATP-hydrolysis states. With the hydrolysis of ATP, RecQ efficiently unwinds the duplex DNA downstream of the i-motif. (C) Typical traces of Bcl2-IM with the addition 100 nM Rep at the apo, ATP-binding, and ATP-hydrolysis states. The traces in the right panels of Figure S11B-C may most possibly reflect the unwinding of duplex DNA due to the simultaneous disappearance of Cy3 and Cy5 as illustrated in Figure S10 for the following reasons. First, the fluorescence of Cy3 is usually more stable than Cy5(1). In most cases of photobleaching, Cy5 would bleach earlier than Cy3; therefore, Cy3 may still last for a while after the disappearance of Cy5 signal, rather than drop at the same time. Second, the signal decreases occur at ~ 20-40 s in the above figures, obviously shorter than the life time of these fluorophores before photobleaching. However, it is worth noting that in some rare cases, due to the in advance photobleaching of Cy3, Cy5 and Cy3 may disappear simultaneously, displaying similar traces as above.



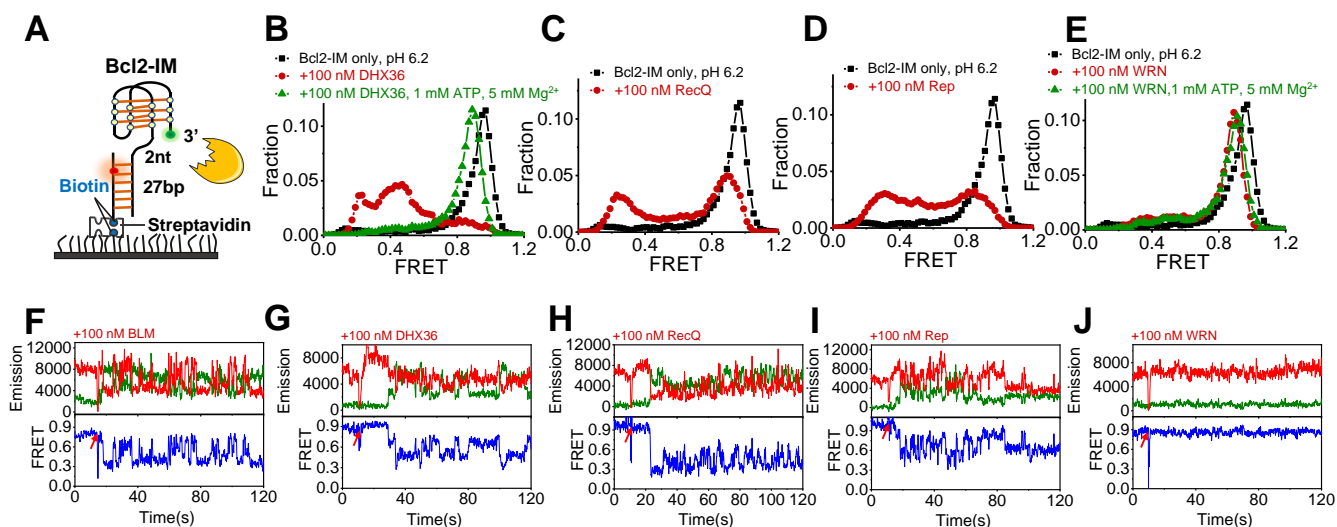

**Figure S12. The ssDNA tail is dispensable for the helicases-mediated i-motif unfolding. Related to Figure 5.** (A) The schematic design of Bcl2-IM substrate. (B) FRET distributions of Bcl2-IM before and 4 min after the addition of DHX36 at the apo and ATP-hydrolysis states. (C-D) FRET distributions of Bcl2-IM before and 4 min after the addition of RecQ and Rep. In the presence of ATP, the downstream duplex DNA was efficiently unwound; therefore, the FRET distributions cannot be determined. (E) FRET distributions of Bcl2-IM before and 4 min after the addition of WRN at the apo and ATP-hydrolysis states. (F-J) The representative traces with the addition of helicases.

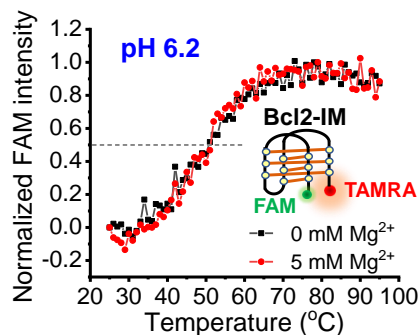

**Figure S13. The effect of Mg<sup>2+</sup> on the thermal stability of Bcl2-IM at pH 6.2. Related to Figure 5.** No obvious changes in the  $T_m$  values can be observed with or without the addition of 5 mM Mg<sup>2+</sup>.

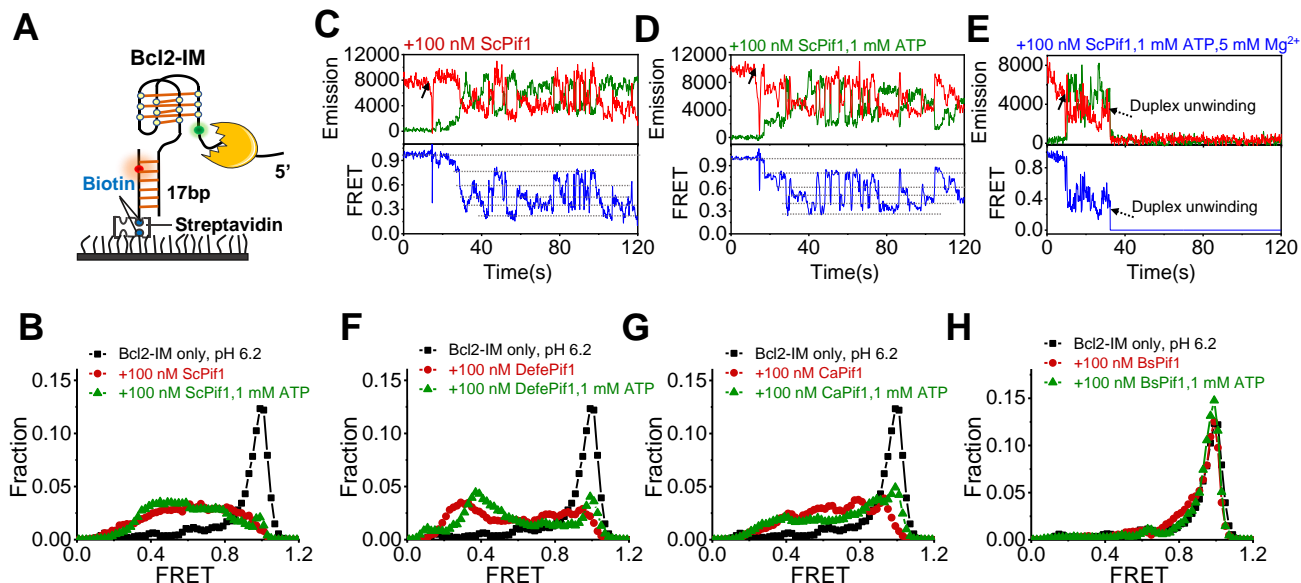

**Figure S14. The 5'-3' helicases repetitively unfold Bcl2-IM in the ATP-independent mode. Related to Figure 5.** (A) The schematic experimental design to characterize the unfolding of Bcl2-IM by the 5'-3' DNA helicases. (B) FRET distributions of Bcl2-IM before and 4 min after the addition of 100 nM Pif1 from *S. cerevisiae* at the apo and ATP-binding states. The downstream duplex was efficiently unwound once the helicase was at the ATP-hydrolysis state; therefore, the FRET distributions cannot be determined. (C-E) The representative fluorescence emission and FRET traces of Bcl2-IM with the addition of 100 nM Pif1 in different ATP states. (F-H) FRET distributions of Bcl2-IM before and 4 min after the addition of 100 nM Pif1 from other species.

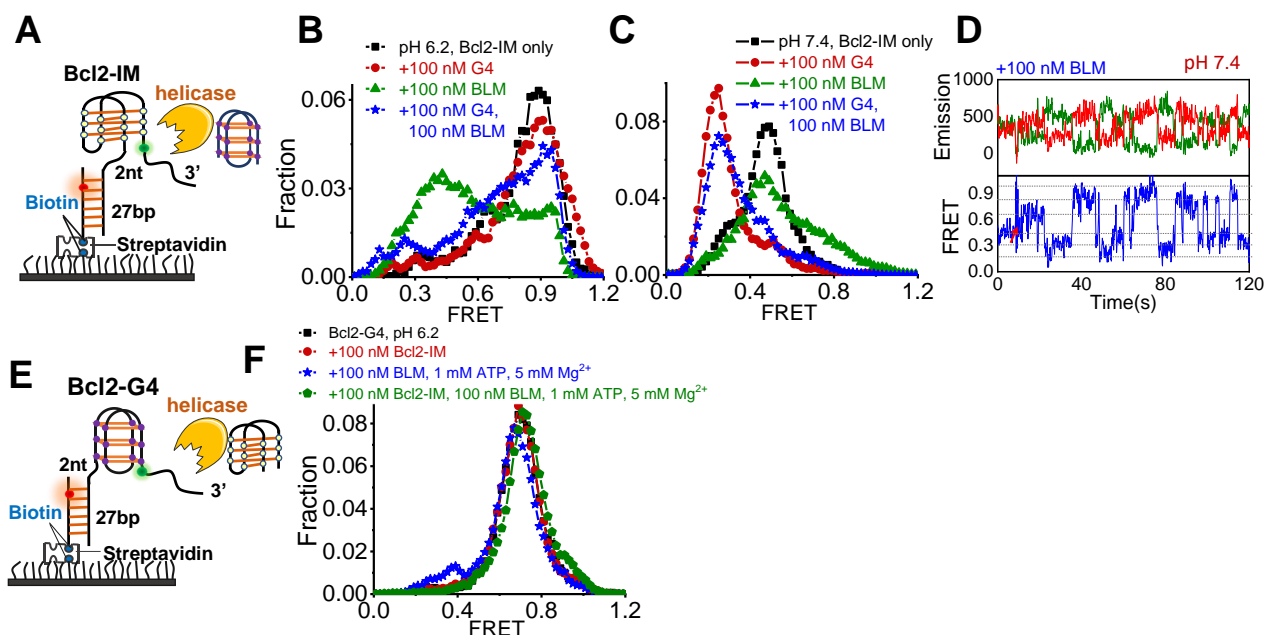

**Figure S15. Competition FRET assay to define the BLM helicase behavior on Bcl2-IM and Bcl2-G4 in the presence of the complementary strands. Related to Figure 5 and Figure 6. (A)** The experimental design to characterize the status of Bcl2-IM. In the first two experiments, 100 nM Bcl2-G4 or 100 nM BLM was added separately to Bcl2-IM as a control. In the third experiment, 100 nM Bcl2-G4 and 100 nM BLM helicases were mixed and then added simultaneously to the Bcl2-IM substrates. It is worth noting that, ATP hydrolysis significantly decreases the unfolding activity of BLM on Bcl2-IM as shown in Figure 5; therefore, ATP was not added here. **(B-C)** The FRET distributions of Bcl2-IM in different reaction conditions at pH 6.2 and pH 7.4. **(D)** The selective traces of Bcl2-IM at pH 7.4 with the addition of 100 nM BLM. **(E)** The experimental design to characterize the status of Bcl2-G4. In the first two experiments, 100 nM Bcl2-IM or 100 nM BLM was added separately to Bcl2-G4 as a control. In the third experiment, 100 nM Bcl2-IM and 100 nM BLM helicases were mixed and then added simultaneously to the Bcl2-G4 substrates. It is worth noting that, ATP hydrolysis was essential for BLM to unfold Bcl2-G4 as shown in Figure 6; therefore, ATP was added here. **(F)** The FRET distributions of Bcl2-G4 in different reaction conditions at pH 6.2. BLM displays little disruptive effects on Bcl2-G4 at low pH regardless of the absence or presence of Bcl2-IM.

**Table S1. DNA sequences used in this study. Related to STAR Methods**

| <b>Names</b> | <b>Oligo sequences (5'-3')</b>                                       |
|--------------|----------------------------------------------------------------------|
|              | <b>sequences (5'-3') of substrates for CD</b>                        |
| Bcl2-IM      | CCCGCCCCCTTCCTCCCGCGCCC                                              |
| hTel-IM      | CCCTAACCTAACCTAACCC                                                  |
| ILPR-IM      | CCCCACACCCCTGTCCCCACACCCC                                            |
| Bcl2-G4      | GGGCGCGGGAGGAAGGGGGCGGG                                              |
| hTel-G4      | GGGTTAGGGTTAGGGTTAGGG                                                |
| ILPR-G4      | GGGGTGTGGGGACAGGGGTGTGGGG                                            |
| Bcl2-Mut     | CTCTCTCTCTCCTCTCTCGTC                                                |
| random ssDNA | GTGTGGTGTGGGGCCCGCGC                                                 |
|              | <b>sequences (5'-3') of substrates for FRET-melting assay</b>        |
| F-Bcl2-IM-T  | <b>FAM</b> CCCGCCCCCTTCCTCCCGCGCCC <b>TAMRA</b>                      |
| F-hTel-IM-T  | <b>FAM</b> CCCTAACCTAACCTAACCC <b>TAMRA</b>                          |
| F-ILPR-IM-T  | <b>FAM</b> CCCCACACCCCTGTCCCCACACCCC <b>TAMRA</b>                    |
| F-Bcl2-G4-T  | <b>FAM</b> GGGCGCGGGAGGAAGGGGGCGGG <b>TAMRA</b>                      |
| F-hTel-G4-T  | <b>FAM</b> GGGTTAGGGTTAGGGTTAGGG <b>TAMRA</b>                        |
| F-ILPR-G4-T  | <b>FAM</b> GGGGTGTGGGGACAGGGGTGTGGGG <b>TAMRA</b>                    |
|              | <b>sequences (5'-3') of substrates for DNA polymerase stop assay</b> |
| 12-nt        | <b>FAM</b> <u>GATTTGATGTAC</u>                                       |
| 18-nt        | <b>FAM</b> GATTTGATGTACAAAAAA                                        |
| 41-nt        | <b>FAM</b> GATTTGATGTACAAAAAAGGGCGCGGGAGGAAGGGGGCGGG                 |
| Bcl2-IMs12   | CCCGCCCCCTTCCTCCCGCGCCCTTTTTT <u>GTACATCAAATC</u>                    |
| hTel-IMs12   | CCCTAACCTAACCTAACCTTTTTT <u>GTACATCAAATC</u>                         |
| ILPR-IMs12   | CCCCACACCCCTGTCCCCACACCCCTTTTTT <u>GTACATCAAATC</u>                  |
| hTel-m2s12   | CCCTAACCTAATTTTTTTTTT <u>GTACATCAAATC</u>                            |
| hTel-m4s12   | CCCTAACCTAACCTTTTTT <u>GTACATCAAATC</u>                              |
|              | <b>sequences (5'-3') of substrates for stopped-flow assay</b>        |
| 16nt-F       | CTCTGCTCGACGGATT <b>FAM</b>                                          |
| H-d16s15     | <b>HEX</b> <u>AATCCGTCGAGCAGAGTTTTTTTTTTTTTTT</u>                    |
|              | <b>sequences (5'-3') of substrates for binding assay</b>             |
| 24nt-F       | <u>GCCCTGGTGCCGACCAACGAAGGT</u> <b>FAM</b>                           |
| 24nt         | <u>ACCTTCGTGGTCGGCACCAGGGC</u>                                       |
| d2012nt-F    | CACTGGCCGTCTT <u>ACGGTCGCTCTGCTCGACG</u> <b>FAM</b>                  |
| d2012nt      | <u>CGTCGAGCAGAGCGACCGTATTATTTTTTTTTT</u>                             |
| F-Bcl2-G4    | <b>FAM</b> GGGCGCGGGAGGAAGGGGGCGGG                                   |
| F-Bcl2-IM    | <b>FAM</b> CCCGCCCCCTTCCTCCCGCGCCC                                   |

| Names         | Oligo sequences (5'-3')                                                         |
|---------------|---------------------------------------------------------------------------------|
|               | <b>sequences (5'-3') of substrates for smFRET</b>                               |
| d27Bcl2-IM    | <u>GCGTGGCACCGGTAATAGGAAATAGGA</u> TTCCCGCCCCCTCCTCCCGCGCCCT-Cy3                |
| d27hTel-IM    | <u>GCGTGGCACCGGTAATAGGAAATAGGA</u> TTCCCTAACCCCTAACCCCTAACCCCT-Cy3              |
| d27ILPR-IM    | <u>GCGTGGCACCGGTAATAGGAAATAGGA</u> TTCCCCACACCCCTGTCCCCACACCCCT-Cy3             |
| d27Bcl2-Mut   | <u>GCGTGGCACCGGTAATAGGAAATAGGA</u> TTCTCTCTCTCTTCCTCTCTCGCTC-Cy3                |
| d27hTel-m1    | <u>GCGTGGCACCGGTAATAGGAAATAGGA</u> TTTTTTTTTTTTTTCCCTAACCCCT-Cy3                |
| d27hTel-m2    | <u>GCGTGGCACCGGTAATAGGAAATAGGA</u> TTTTTTTTCCCTAACCCCTTTTTTT-Cy3                |
| d27hTel-m3    | <u>GCGTGGCACCGGTAATAGGAAATAGGA</u> TTTTTTTTCCCTAATTTTAACCCCT-Cy3                |
| d27hTel-m4    | <u>GCGTGGCACCGGTAATAGGAAATAGGA</u> TTTTTTTTCCCTAACCCCTAACCCCT-Cy3               |
| d27Bcl2-IMs14 | <u>GCGTGGCACCGGTAATAGGAAATAGGA</u> TTCCCGCCCCCTCCTCCCGCGCCCT(iCy3)TTTTTTTTTTTT  |
| d27Bcl2-G4s14 | <u>GCGTGGCACCGGTAATAGGAAATAGGA</u> TTGGGCGCGGGAGGAAGGGGGCGGGT(iCy3)TTTTTTTTTTTT |
| Stem          | <u>TCCTAT(iCy5)TTCCTATTACCGGTGCCACGC</u> -Biotin                                |
| Bcl2-G4d15    | <b>Cy5-GGGCGCGGGAGGAAGGGGGCGGG</b> TTGTATGACAAGGAAGG                            |
| s14Bcl2-IMd15 | TTTTTTTTTTTTT <b>T(iCy3)</b> TTCCCGCCCCCTCCTCCCGCGCCCTGTATGACAAGGAAGG           |
| Stem          | <b>Biotin</b> - <u>CCTTCCTTGTCAT(iCy5)AC</u>                                    |

All the internal fluorophores were labeled via the base thymine.

**Table S2. The  $K_d$  values resulted from fitting. Related to Figure 4 and Figure S9.**

|         | BLM   |            | DHX36 |           | RecQ  |           | Rep   |           |
|---------|-------|------------|-------|-----------|-------|-----------|-------|-----------|
|         | $K_d$ | $Error$    | $K_d$ | $Error$   | $K_d$ | $Error$   | $K_d$ | $Error$   |
| Duplex  | *     | *          | *     | *         | *     | *         | 329.9 | $\pm 51$  |
| Fork    | 101.4 | $\pm 17.0$ | *     | *         | *     | *         | 76.04 | $\pm 32$  |
| Bcl2-G4 | 97.7  | $\pm 28.1$ | *     | *         | *     | *         | *     | *         |
| Bcl2-IM | 22.0  | $\pm 3.7$  | 9.9   | $\pm 0.7$ | 38.5  | $\pm 3.5$ | 12.5  | $\pm 0.5$ |

\* denotes the binding curves were not available or could not be fitted due to the poor binding affinity.

**Table S3. The number of FRET traces used in the FRET distributions. Related to Figures 1-7.**

|             |                                        |           |                           |                             |        |        |
|-------------|----------------------------------------|-----------|---------------------------|-----------------------------|--------|--------|
|             |                                        | pH 6.2    | pH 6.6                    | pH 7.0                      | pH 7.4 | pH 8.0 |
| Figure 2B   | Bcl2-iM                                | 350       | 376                       | 412                         | 475    | 394    |
| Figure S4B  | Bcl2-G4                                | 319       | 306                       | 378                         | 263    | 304    |
| Figure S1D  | Bcl2-Mut                               | 375       | 401                       | 327                         | 360    | 350    |
| Figure 5B   | hTel-iM                                | 442       | 514                       | 346                         | 308    | 479    |
| Figure 5G   | ILPR-iM                                | 453       | 438                       | 483                         | 325    | 368    |
|             |                                        | pH 5.8    |                           |                             |        |        |
|             | hTel-m1                                | 299       |                           |                             |        |        |
| Figure S7B  | hTel-m2                                | 459       |                           |                             |        |        |
|             | hTel-m3                                | 312       |                           |                             |        |        |
|             | hTel-m4                                | 338       |                           |                             |        |        |
|             |                                        | +10 nM    | +50 nM RPA                | +1 μM                       |        |        |
| Figure 3B   | Bcl2-iM                                | 277       | 292                       | 258                         |        |        |
| Figure S8A  | Bcl2-Mut                               | 329       | 472                       | 303                         |        |        |
|             |                                        | +BLM      | +BLM+ATP                  | +BLM+ATP+Mg <sup>2+</sup>   |        |        |
| Figure 5H   | Bcl2-iM                                | 341       | *                         | 408                         |        |        |
| Figure 5B   | Bcl2-iMT14,                            | 367       | 409                       | 317                         |        |        |
| Figure 6B   | Bcl2-G4T14,                            | 328       | *                         | 354                         |        |        |
|             | pH 6.2                                 |           |                           |                             |        |        |
| Figure 6C   | Bcl2-G4T14,                            | 357       | *                         | 398                         |        |        |
|             | pH 7.4                                 |           |                           |                             |        |        |
|             |                                        | +DHX36    | +DHX36+ATP                | +DHX36+ATP+Mg <sup>2+</sup> |        |        |
| Figure S12B | Bcl2-iM                                | 344       | *                         | 449                         |        |        |
| Figure 5F   | Bcl2-iMT14                             | 501       | 423                       | 279                         |        |        |
| Figure 6E   | Bcl2-G4T14                             | 406       | *                         | 409                         |        |        |
|             |                                        | +RecQ     | +RecQ+ATP                 | +RecQ+ATP+Mg <sup>2+</sup>  |        |        |
| Figure S12C | Bcl2-iM                                | 386       | *                         | *                           |        |        |
| Figure S10D | Bcl2-iMT14                             | 495       | 346                       | *                           |        |        |
| Figure 6F   | Bcl2-G4T14                             | 365       | *                         | 346                         |        |        |
|             |                                        | +Rep      | +Rep+ATP                  | +Rep+ATP+Mg <sup>2+</sup>   |        |        |
| Figure S12D | Bcl2-iM                                | 301       | *                         | *                           |        |        |
| Figure S10E | Bcl2-iMT14                             | 329       | 279                       | *                           |        |        |
| Figure 6G   | Bcl2-G4T14                             | 419       | *                         | 348                         |        |        |
|             |                                        | +WRN      | +WRN+ATP+Mg <sup>2+</sup> |                             |        |        |
| Figure S12E | Bcl2-iM                                | 331       | 447                       |                             |        |        |
|             |                                        | +ScPif1   | +ScPif1+ATP               |                             |        |        |
| Figure S14B | T14Bcl2-iM                             | 360       | 285                       |                             |        |        |
|             |                                        | +DefePif1 | +DefePif1+ATP             |                             |        |        |
| Figure S14F | T14Bcl2-iM                             | 450       | 296                       |                             |        |        |
|             |                                        | +CaPif1   | +CaPif1+ATP               |                             |        |        |
| Figure S14G | T14Bcl2-iM                             | 348       | 297                       |                             |        |        |
|             |                                        | +BsPif1   | +BsPif1+ATP               |                             |        |        |
| Figure S14H | T14Bcl2-iM                             | 363       | 265                       |                             |        |        |
|             |                                        | +G4       | +BLM                      | +G4+BLM                     |        |        |
| Figure S15B | Bcl2-iMT14,                            | 462       | 367                       | 324                         |        |        |
|             | pH 6.2                                 |           |                           |                             |        |        |
| Figure S15C | Bcl2-iMT14,                            | 331       | 301                       | 363                         |        |        |
|             | pH 7.4                                 |           |                           |                             |        |        |
| Figure S15F | Bcl2G4T14+iM                           | 402       |                           |                             |        |        |
|             | Bcl2-G4T14+iM+BLM+ATP+Mg <sup>2+</sup> |           | 338                       |                             |        |        |

\* denotes that the substrates were efficiently unwound by helicases or under this condition no experiment has been carried out
